# Supplementary material for: Diverging Effects of Adolescent Ethanol Exposure on Tripartite Synaptic Development across Prefrontal Cortex Subregions
Source: MDPI journal article supplement (doi:10.3390/cells11193111), 2022-10-02
Supplement: s1 [file s1]

Figure 2A.

| Table Analyzed                    | 10th Dose Astrocyte Volume |                    |                  |                     |                  |
|-----------------------------------|----------------------------|--------------------|------------------|---------------------|------------------|
| Two-way ANOVA                     | Ordinary                   |                    |                  |                     |                  |
| Alpha                             | 0.05                       |                    |                  |                     |                  |
| Source of Variation               | % of total variation       | P value            | P value summary  | Significant?        |                  |
| Interaction                       | 0.1112                     | 0.8458             | ns               | No                  |                  |
| Subregion                         | 34.72                      | <0.0001            | ****             | Yes                 |                  |
| Treatment                         | 0.1706                     | 0.2639             | ns               | No                  |                  |
| ANOVA table                       | SS (Type III)              | DF                 | MS               | F (DFn, DFd)        | P value          |
| Interaction                       | 77421304                   | 3                  | 25807101         | F (3, 476) = 0.2718 | P=0.8458         |
| Subregion                         | 24169310491                | 3                  | 8056436830       | F (3, 476) = 84.85  | P<0.0001         |
| Treatment                         | 118786953                  | 1                  | 118786953        | F (1, 476) = 1.251  | P=0.2639         |
| Residual                          | 45197895063                | 476                | 94953561         |                     |                  |
| Tukey's multiple comparisons test | Predicted (LS) mean diff.  | 95.00% CI of diff. | Below threshold? | Summary             | Adjusted P Value |
| ACC:H2O vs. ACC:EtOH              | 650.6                      | -5283 to 6584      | No               | ns                  | >0.9999          |
| ACC:H2O vs. mPFC:H2O              | -4635                      | -9828 to 557.9     | No               | ns                  | 0.1199           |
| ACC:H2O vs. mPFC:EtOH             | -2702                      | -7895 to 2491      | No               | ns                  | 0.7597           |
| ACC:H2O vs. LO-OFC:H2O            | 11034                      | 5100 to 16967      | Yes              | ****                | <0.0001          |
| ACC:H2O vs. LO-OFC:EtOH           | 12662                      | 6729 to 18596      | Yes              | ****                | <0.0001          |
| ACC:H2O vs. VO-OFC:H2O            | 11796                      | 5802 to 17791      | Yes              | ****                | <0.0001          |
| ACC:H2O vs. VO-OFC:EtOH           | 11705                      | 5710 to 17700      | Yes              | ****                | <0.0001          |
| ACC:EtOH vs. mPFC:H2O             | -5285                      | -10478 to -92.63   | Yes              | *                   | 0.0427           |
| ACC:EtOH vs. mPFC:EtOH            | -3353                      | -8545 to 1840      | No               | ns                  | 0.5064           |
| ACC:EtOH vs. LO-OFC:H2O           | 10383                      | 4450 to 16316      | Yes              | ****                | <0.0001          |
| ACC:EtOH vs. LO-OFC:EtOH          | 12012                      | 6079 to 17945      | Yes              | ****                | <0.0001          |
| ACC:EtOH vs. VO-OFC:H2O           | 11146                      | 5151 to 17141      | Yes              | ****                | <0.0001          |
| ACC:EtOH vs. VO-OFC:EtOH          | 11054                      | 5059 to 17049      | Yes              | ****                | <0.0001          |
| mPFC:H2O vs. mPFC:EtOH            | 1933                       | -2394 to 6260      | No               | ns                  | 0.8748           |
| mPFC:H2O vs. LO-OFC:H2O           | 15668                      | 10476 to 20861     | Yes              | ****                | <0.0001          |
| mPFC:H2O vs. LO-OFC:EtOH          | 17297                      | 12105 to 22490     | Yes              | ****                | <0.0001          |
| mPFC:H2O vs. VO-OFC:H2O           | 16431                      | 11168 to 21694     | Yes              | ****                | <0.0001          |
| mPFC:H2O vs. VO-OFC:EtOH          | 16340                      | 11077 to 21603     | Yes              | ****                | <0.0001          |
| mPFC:EtOH vs. LO-OFC:H2O          | 13736                      | 8543 to 18928      | Yes              | ****                | <0.0001          |
| mPFC:EtOH vs. LO-OFC:EtOH         | 15364                      | 10172 to 20557     | Yes              | ****                | <0.0001          |
| mPFC:EtOH vs. VO-OFC:H2O          | 14498                      | 9235 to 19761      | Yes              | ****                | <0.0001          |
| mPFC:EtOH vs. VO-OFC:EtOH         | 14407                      | 9144 to 19670      | Yes              | ****                | <0.0001          |
| LO-OFC:H2O vs. LO-OFC:EtOH        | 1629                       | -4304 to 7562      | No               | ns                  | 0.991            |
| LO-OFC:H2O vs. VO-OFC:H2O         | 762.8                      | -5232 to 6758      | No               | ns                  | >0.9999          |
| LO-OFC:H2O vs. VO-OFC:EtOH        | 671.2                      | -5324 to 6666      | No               | ns                  | >0.9999          |
| LO-OFC:EtOH vs. VO-OFC:H2O        | -866.1                     | -6861 to 5129      | No               | ns                  | 0.9999           |
| LO-OFC:EtOH vs. VO-OFC:EtOH       | -957.7                     | -6952 to 5037      | No               | ns                  | 0.9997           |
| VO-OFC:H2O vs. VO-OFC:EtOH        | -91.6                      | -6147 to 5964      | No               | ns                  | >0.9999          |

Figure 2 B

| Table Analyzed                    | 26DWO Astrocyte Volume    |                    |                  |                     |                  |
|-----------------------------------|---------------------------|--------------------|------------------|---------------------|------------------|
| Two-way ANOVA                     | Ordinary                  |                    |                  |                     |                  |
| Alpha                             | 0.05                      |                    |                  |                     |                  |
| Source of Variation               | % of total variation      | P value            | P value summary  | Significant?        |                  |
| Interaction                       | 0.08666                   | 0.8121             | ns               | No                  |                  |
| Subregion                         | 56.74                     | <0.0001            | ****             | Yes                 |                  |
| Treatment                         | 0.01762                   | 0.6597             | ns               | No                  |                  |
| ANOVA table                       | SS (Type III)             | DF                 | MS               | F (DFn, DFd)        | P value          |
| Interaction                       | 54697533                  | 3                  | 18232511         | F (3, 471) = 0.3184 | P=0.8121         |
| Subregion                         | 35812955773               | 3                  | 11937651924      | F (3, 471) = 208.4  | P<0.0001         |
| Treatment                         | 11119535                  | 1                  | 11119535         | F (1, 471) = 0.1942 | P=0.6597         |
| Residual                          | 26974067840               | 471                | 57269783         |                     |                  |
| Tukey's multiple comparisons test | Predicted (LS) mean diff. | 95.00% CI of diff. | Below threshold? | Summary             | Adjusted P Value |
| ACC:H2O vs. ACC:EtOH              | 291                       | -4143 to 4725      | No               | ns                  | >0.9999          |
| ACC:H2O vs. mPFC:H2O              | -4060                     | -7965 to -155.4    | Yes              | *                   | 0.0349           |
| ACC:H2O vs. mPFC:EtOH             | -4777                     | -8976 to -576.9    | Yes              | *                   | 0.0135           |
| ACC:H2O vs. LO-OFC:H2O            | 12034                     | 7557 to 16510      | Yes              | ****                | <0.0001          |
| ACC:H2O vs. LO-OFC:EtOH           | 12879                     | 8402 to 17355      | Yes              | ****                | <0.0001          |
| ACC:H2O vs. VO-OFC:H2O            | 16046                     | 11525 to 20568     | Yes              | ****                | <0.0001          |
| ACC:H2O vs. VO-OFC:EtOH           | 16874                     | 12376 to 21373     | Yes              | ****                | <0.0001          |
| ACC:EtOH vs. mPFC:H2O             | -4351                     | -8256 to -446.3    | Yes              | *                   | 0.017            |
| ACC:EtOH vs. mPFC:EtOH            | -5068                     | -9267 to -867.9    | Yes              | **                  | 0.0064           |
| ACC:EtOH vs. LO-OFC:H2O           | 11743                     | 7266 to 16219      | Yes              | ****                | <0.0001          |
| ACC:EtOH vs. LO-OFC:EtOH          | 12588                     | 8111 to 17065      | Yes              | ****                | <0.0001          |
| ACC:EtOH vs. VO-OFC:H2O           | 15756                     | 11234 to 20278     | Yes              | ****                | <0.0001          |
| ACC:EtOH vs. VO-OFC:EtOH          | 16583                     | 12085 to 21082     | Yes              | ****                | <0.0001          |
| mPFC:H2O vs. mPFC:EtOH            | -716.4                    | -4353 to 2920      | No               | ns                  | 0.9989           |
| mPFC:H2O vs. LO-OFC:H2O           | 16094                     | 12141 to 20047     | Yes              | ****                | <0.0001          |
| mPFC:H2O vs. LO-OFC:EtOH          | 16939                     | 12986 to 20892     | Yes              | ****                | <0.0001          |
| mPFC:H2O vs. VO-OFC:H2O           | 20107                     | 16102 to 24111     | Yes              | ****                | <0.0001          |
| mPFC:H2O vs. VO-OFC:EtOH          | 20935                     | 16956 to 24913     | Yes              | ****                | <0.0001          |
| mPFC:EtOH vs. LO-OFC:H2O          | 16810                     | 12566 to 21055     | Yes              | ****                | <0.0001          |
| mPFC:EtOH vs. LO-OFC:EtOH         | 17656                     | 13411 to 21900     | Yes              | ****                | <0.0001          |
| mPFC:EtOH vs. VO-OFC:H2O          | 20823                     | 16531 to 25116     | Yes              | ****                | <0.0001          |
| mPFC:EtOH vs. VO-OFC:EtOH         | 21651                     | 17383 to 25919     | Yes              | ****                | <0.0001          |
| LO-OFC:H2O vs. LO-OFC:EtOH        | 845.3                     | -3673 to 5364      | No               | ns                  | 0.9992           |
| LO-OFC:H2O vs. VO-OFC:H2O         | 4013                      | -550.7 to 8577     | No               | ns                  | 0.1322           |
| LO-OFC:H2O vs. VO-OFC:EtOH        | 4841                      | 300.1 to 9382      | Yes              | *                   | 0.0273           |
| LO-OFC:EtOH vs. VO-OFC:H2O        | 3168                      | -1396 to 7731      | No               | ns                  | 0.4078           |
| LO-OFC:EtOH vs. VO-OFC:EtOH       | 3996                      | -545.2 to 8536     | No               | ns                  | 0.1316           |
| VO-OFC:H2O vs. VO-OFC:EtOH        | 827.9                     | -3758 to 5413      | No               | ns                  | 0.9994           |

Figure 3A

| Table Analyzed                    | 10th PAP-Synaptic Coloc   |                       |                  |                    |                  |
|-----------------------------------|---------------------------|-----------------------|------------------|--------------------|------------------|
| Two-way ANOVA                     | Ordinary                  |                       |                  |                    |                  |
| Alpha                             | 0.05                      |                       |                  |                    |                  |
| Source of Variation               | % of total variation      | P value               | P value summary  | Significant?       |                  |
| Interaction                       | 1.072                     | 0.0159                | *                | Yes                |                  |
| Subregion                         | 49.46                     | <0.0001               | ****             | Yes                |                  |
| Treatment                         | 0.5236                    | 0.0244                | *                | Yes                |                  |
| ANOVA table                       | SS (Type III)             | DF                    | MS               | F (DFn, DFd)       | P value          |
| Interaction                       | 0.01229                   | 3                     | 0.004096         | F (3, 476) = 3.480 | P=0.0159         |
| Subregion                         | 0.5667                    | 3                     | 0.1889           | F (3, 476) = 160.5 | P<0.0001         |
| Treatment                         | 0.006                     | 1                     | 0.006            | F (1, 476) = 5.097 | P=0.0244         |
| Residual                          | 0.5602                    | 476                   | 0.001177         |                    |                  |
| Tukey's multiple comparisons test | Predicted (LS) mean diff. | 95.00% CI of diff.    | Below threshold? | Summary            | Adjusted P Value |
| ACC:H2O vs. ACC:EtOH              | 0.01808                   | -0.002806 to 0.03897  | No               | ns                 | 0.1459           |
| ACC:H2O vs. mPFC:H2O              | 0.002078                  | -0.01620 to 0.02036   | No               | ns                 | >0.9999          |
| ACC:H2O vs. mPFC:EtOH             | 0.01019                   | -0.008091 to 0.02847  | No               | ns                 | 0.6892           |
| ACC:H2O vs. LO-OFC:H2O            | -0.04176                  | -0.06265 to -0.02087  | Yes              | ****               | <0.0001          |
| ACC:H2O vs. LO-OFC:EtOH           | -0.05266                  | -0.07355 to -0.03177  | Yes              | ****               | <0.0001          |
| ACC:H2O vs. VO-OFC:H2O            | -0.081                    | -0.1021 to -0.05989   | Yes              | ****               | <0.0001          |
| ACC:H2O vs. VO-OFC:EtOH           | -0.06701                  | -0.08812 to -0.04591  | Yes              | ****               | <0.0001          |
| ACC:EtOH vs. mPFC:H2O             | -0.01601                  | -0.03429 to 0.002277  | No               | ns                 | 0.136            |
| ACC:EtOH vs. mPFC:EtOH            | -0.007891                 | -0.02617 to 0.01039   | No               | ns                 | 0.8933           |
| ACC:EtOH vs. LO-OFC:H2O           | -0.05984                  | -0.08073 to -0.03895  | Yes              | ****               | <0.0001          |
| ACC:EtOH vs. LO-OFC:EtOH          | -0.07074                  | -0.09163 to -0.04985  | Yes              | ****               | <0.0001          |
| ACC:EtOH vs. VO-OFC:H2O           | -0.09908                  | -0.1202 to -0.07798   | Yes              | ****               | <0.0001          |
| ACC:EtOH vs. VO-OFC:EtOH          | -0.08509                  | -0.1062 to -0.06399   | Yes              | ****               | <0.0001          |
| mPFC:H2O vs. mPFC:EtOH            | 0.008114                  | -0.007121 to 0.02335  | No               | ns                 | 0.7372           |
| mPFC:H2O vs. LO-OFC:H2O           | -0.04384                  | -0.06212 to -0.02555  | Yes              | ****               | <0.0001          |
| mPFC:H2O vs. LO-OFC:EtOH          | -0.05473                  | -0.07302 to -0.03645  | Yes              | ****               | <0.0001          |
| mPFC:H2O vs. VO-OFC:H2O           | -0.08308                  | -0.1016 to -0.06455   | Yes              | ****               | <0.0001          |
| mPFC:H2O vs. VO-OFC:EtOH          | -0.06909                  | -0.08762 to -0.05056  | Yes              | ****               | <0.0001          |
| mPFC:EtOH vs. LO-OFC:H2O          | -0.05195                  | -0.07023 to -0.03367  | Yes              | ****               | <0.0001          |
| mPFC:EtOH vs. LO-OFC:EtOH         | -0.06285                  | -0.08113 to -0.04457  | Yes              | ****               | <0.0001          |
| mPFC:EtOH vs. VO-OFC:H2O          | -0.09119                  | -0.1097 to -0.07266   | Yes              | ****               | <0.0001          |
| mPFC:EtOH vs. VO-OFC:EtOH         | -0.0772                   | -0.09573 to -0.05867  | Yes              | ****               | <0.0001          |
| LO-OFC:H2O vs. LO-OFC:EtOH        | -0.0109                   | -0.03179 to 0.009991  | No               | ns                 | 0.7572           |
| LO-OFC:H2O vs. VO-OFC:H2O         | -0.03924                  | -0.06035 to -0.01813  | Yes              | ****               | <0.0001          |
| LO-OFC:H2O vs. VO-OFC:EtOH        | -0.02525                  | -0.04636 to -0.004148 | Yes              | **                 | 0.0072           |
| LO-OFC:EtOH vs. VO-OFC:H2O        | -0.02834                  | -0.04945 to -0.007236 | Yes              | **                 | 0.0013           |
| LO-OFC:EtOH vs. VO-OFC:EtOH       | -0.01436                  | -0.03546 to 0.006750  | No               | ns                 | 0.4355           |
| VO-OFC:H2O vs. VO-OFC:EtOH        | 0.01399                   | -0.007334 to 0.03531  | No               | ns                 | 0.4848           |

Figure 3B

| Table Analyzed                    | 26DWO PAP-Synaptic Coloc  |                      |                  |                    |                  |
|-----------------------------------|---------------------------|----------------------|------------------|--------------------|------------------|
| Two-way ANOVA                     | Ordinary                  |                      |                  |                    |                  |
| Alpha                             | 0.05                      |                      |                  |                    |                  |
| Source of Variation               | % of total variation      | P value              | P value summary  | Significant?       |                  |
| Interaction                       | 5.654                     | <0.0001              | ****             | Yes                |                  |
| Subregion                         | 54.37                     | <0.0001              | ****             | Yes                |                  |
| Treatment                         | 2.7                       | <0.0001              | ****             | Yes                |                  |
| ANOVA table                       | SS (Type III)             | DF                   | MS               | F (DFn, DFd)       | P value          |
| Interaction                       | 0.07767                   | 3                    | 0.02589          | F (3, 502) = 24.70 | P<0.0001         |
| Subregion                         | 0.747                     | 3                    | 0.249            | F (3, 502) = 237.6 | P<0.0001         |
| Treatment                         | 0.03709                   | 1                    | 0.03709          | F (1, 502) = 35.38 | P<0.0001         |
| Residual                          | 0.5262                    | 502                  | 0.001048         |                    |                  |
| Tukey's multiple comparisons test | Predicted (LS) mean diff. | 95.00% CI of diff.   | Below threshold? | Summary            | Adjusted P Value |
| ACC:H2O vs. ACC:EtOH              | 0.02283                   | 0.003870 to 0.04180  | Yes              | **                 | 0.0066           |
| ACC:H2O vs. mPFC:H2O              | 0.03108                   | 0.01438 to 0.04778   | Yes              | ****               | <0.0001          |
| ACC:H2O vs. mPFC:EtOH             | 0.02574                   | 0.009042 to 0.04244  | Yes              | ****               | <0.0001          |
| ACC:H2O vs. LO-OFC:H2O            | -0.04216                  | -0.06130 to -0.02301 | Yes              | ****               | <0.0001          |
| ACC:H2O vs. LO-OFC:EtOH           | -0.0465                   | -0.06564 to -0.02735 | Yes              | ****               | <0.0001          |
| ACC:H2O vs. VO-OFC:H2O            | -0.09188                  | -0.1111 to -0.07264  | Yes              | ****               | <0.0001          |
| ACC:H2O vs. VO-OFC:EtOH           | -0.03425                  | -0.05349 to -0.01501 | Yes              | ****               | <0.0001          |
| ACC:EtOH vs. mPFC:H2O             | 0.008242                  | -0.008458 to 0.02494 | No               | ns                 | 0.8062           |
| ACC:EtOH vs. mPFC:EtOH            | 0.002908                  | -0.01379 to 0.01961  | No               | ns                 | 0.9995           |
| ACC:EtOH vs. LO-OFC:H2O           | -0.06499                  | -0.08414 to -0.04584 | Yes              | ****               | <0.0001          |
| ACC:EtOH vs. LO-OFC:EtOH          | -0.06933                  | -0.08848 to -0.05018 | Yes              | ****               | <0.0001          |
| ACC:EtOH vs. VO-OFC:H2O           | -0.1147                   | -0.1340 to -0.09547  | Yes              | ****               | <0.0001          |
| ACC:EtOH vs. VO-OFC:EtOH          | -0.05708                  | -0.07632 to -0.03784 | Yes              | ****               | <0.0001          |
| mPFC:H2O vs. mPFC:EtOH            | -0.005334                 | -0.01941 to 0.008743 | No               | ns                 | 0.9444           |
| mPFC:H2O vs. LO-OFC:H2O           | -0.07323                  | -0.09014 to -0.05633 | Yes              | ****               | <0.0001          |
| mPFC:H2O vs. LO-OFC:EtOH          | -0.07757                  | -0.09448 to -0.06067 | Yes              | ****               | <0.0001          |
| mPFC:H2O vs. VO-OFC:H2O           | -0.123                    | -0.1400 to -0.1059   | Yes              | ****               | <0.0001          |
| mPFC:H2O vs. VO-OFC:EtOH          | -0.06532                  | -0.08234 to -0.04831 | Yes              | ****               | <0.0001          |
| mPFC:EtOH vs. LO-OFC:H2O          | -0.0679                   | -0.08480 to -0.05099 | Yes              | ****               | <0.0001          |
| mPFC:EtOH vs. LO-OFC:EtOH         | -0.07224                  | -0.08915 to -0.05533 | Yes              | ****               | <0.0001          |
| mPFC:EtOH vs. VO-OFC:H2O          | -0.1176                   | -0.1346 to -0.1006   | Yes              | ****               | <0.0001          |
| mPFC:EtOH vs. VO-OFC:EtOH         | -0.05999                  | -0.07700 to -0.04298 | Yes              | ****               | <0.0001          |
| LO-OFC:H2O vs. LO-OFC:EtOH        | -0.00434                  | -0.02367 to 0.01499  | No               | ns                 | 0.9974           |
| LO-OFC:H2O vs. VO-OFC:H2O         | -0.04972                  | -0.06914 to -0.03030 | Yes              | ****               | <0.0001          |
| LO-OFC:H2O vs. VO-OFC:EtOH        | 0.007908                  | -0.01151 to 0.02733  | No               | ns                 | 0.9198           |
| LO-OFC:EtOH vs. VO-OFC:H2O        | -0.04538                  | -0.06480 to -0.02596 | Yes              | ****               | <0.0001          |
| LO-OFC:EtOH vs. VO-OFC:EtOH       | 0.01225                   | -0.007172 to 0.03167 | No               | ns                 | 0.5379           |
| VO-OFC:H2O vs. VO-OFC:EtOH        | 0.05763                   | 0.03812 to 0.07714   | Yes              | ****               | <0.0001          |

Accompanies Figure 4.

| Table Analyzed                                      | Spine Density        |                     |                                     |                 |                              |
|-----------------------------------------------------|----------------------|---------------------|-------------------------------------|-----------------|------------------------------|
| Two-way ANOVA                                       | Ordinary             |                     |                                     |                 |                              |
| Alpha                                               | 0.05                 |                     |                                     |                 |                              |
| Source of Variation                                 | % of total variation | P value             | P value summary                     | Significant?    |                              |
| Interaction                                         | 0.9223               | 0.337               | ns                                  | No              |                              |
| Treatment                                           | 3.073                | 0.011               | *                                   | Yes             |                              |
| Subregion                                           | 0.2171               | 0.3723              | ns                                  | No              |                              |
| ANOVA table                                         | SS                   | DF                  | MS                                  | F (DFn, DFd)    | P value                      |
| Interaction                                         | 0.08207              | 3                   |                                     | 0.02736         | F (3, 352) = 1.130 P=0.3370  |
| Treatment                                           | 0.2735               | 3                   |                                     | 0.09115         | F (3, 352) = 3.764 P=0.0110  |
| Subregion                                           | 0.01932              | 1                   |                                     | 0.01932         | F (1, 352) = 0.7979 P=0.3723 |
| Residual                                            | 8.524                | 352                 |                                     | 0.02422         |                              |
| Difference between column means                     |                      |                     |                                     |                 |                              |
| Mean of H <sub>2</sub> O                            | 0.9292               |                     |                                     |                 |                              |
| Mean of EtOH                                        | 0.9145               |                     |                                     |                 |                              |
| Difference between means                            | 0.01465              |                     |                                     |                 |                              |
| SE of difference                                    | 0.0164               |                     |                                     |                 |                              |
| 95% CI of difference                                | -0.01761 to 0.04691  |                     |                                     |                 |                              |
| Normality of Residuals                              |                      |                     |                                     |                 |                              |
| Test name                                           | Statistics           | P value             | Passed normality test (alpha=0.05)? | P value summary |                              |
| D'Agostino-Pearson omnibus (K2)                     | 16.32                | 0.0003              | No                                  | ***             |                              |
| Anderson-Darling (A2*)                              | 1.431                | 0.0011              | No                                  | **              |                              |
| Shapiro-Wilk (W)                                    | 0.9776               | <0.0001             | No                                  | ****            |                              |
| Kolmogorov-Smirnov (distance)                       | 0.05498              | 0.0108              | No                                  | *               |                              |
| Data summary                                        |                      |                     |                                     |                 |                              |
| Number of columns (Subregion)                       | 2                    |                     |                                     |                 |                              |
| Number of rows (Treatment)                          | 4                    |                     |                                     |                 |                              |
| Number of values                                    | 360                  |                     |                                     |                 |                              |
| Compare cell means regardless of rows and columns   |                      |                     |                                     |                 |                              |
| Number of families                                  | 1                    |                     |                                     |                 |                              |
| Number of comparisons per family                    | 28                   |                     |                                     |                 |                              |
| Alpha                                               | 0.05                 |                     |                                     |                 |                              |
| Tukey's multiple comparisons test                   | Mean Diff.           | 95.00% CI of diff.  | Below threshold?                    | Summary         | Adjusted P Value             |
| ACC:H <sub>2</sub> O vs. ACC:EtOH                   | 0.06107              | -0.03897 to 0.1611  | No                                  | ns              | 0.5784                       |
| ACC:H <sub>2</sub> O vs. mPFC:H <sub>2</sub> O      | 0.09903              | -0.001011 to 0.1991 | No                                  | ns              | 0.0546                       |
| ACC:H <sub>2</sub> O vs. mPFC:EtOH                  | 0.07684              | -0.02320 to 0.1769  | No                                  | ns              | 0.2739                       |
| ACC:H <sub>2</sub> O vs. LO-OFC:H <sub>2</sub> O    | 0.01307              | -0.08697 to 0.1131  | No                                  | ns              | >0.9999                      |
| ACC:H <sub>2</sub> O vs. LO-OFC:EtOH                | 0.02964              | -0.07039 to 0.1297  | No                                  | ns              | 0.9856                       |
| ACC:H <sub>2</sub> O vs. VO-OFC:H <sub>2</sub> O    | 0.06911              | -0.03093 to 0.1691  | No                                  | ns              | 0.4127                       |
| ACC:H <sub>2</sub> O vs. VO-OFC:EtOH                | 0.07227              | -0.02777 to 0.1723  | No                                  | ns              | 0.3526                       |
| ACC:EtOH vs. mPFC:H <sub>2</sub> O                  | 0.03796              | -0.06208 to 0.1380  | No                                  | ns              | 0.9433                       |
| ACC:EtOH vs. mPFC:EtOH                              | 0.01577              | -0.08427 to 0.1158  | No                                  | ns              | 0.9997                       |
| ACC:EtOH vs. LO-OFC:H <sub>2</sub> O                | -0.048               | -0.1480 to 0.05204  | No                                  | ns              | 0.8265                       |
| ACC:EtOH vs. LO-OFC:EtOH                            | -0.03143             | -0.1315 to 0.06861  | No                                  | ns              | 0.9798                       |
| ACC:EtOH vs. VO-OFC:H <sub>2</sub> O                | 0.008041             | -0.09200 to 0.1081  | No                                  | ns              | >0.9999                      |
| ACC:EtOH vs. VO-OFC:EtOH                            | 0.0112               | -0.08884 to 0.1112  | No                                  | ns              | >0.9999                      |
| mPFC:H <sub>2</sub> O vs. mPFC:EtOH                 | -0.02219             | -0.1222 to 0.07785  | No                                  | ns              | 0.9976                       |
| mPFC:H <sub>2</sub> O vs. LO-OFC:H <sub>2</sub> O   | -0.08596             | -0.1860 to 0.01408  | No                                  | ns              | 0.1522                       |
| mPFC:H <sub>2</sub> O vs. LO-OFC:EtOH               | -0.06938             | -0.1694 to 0.03065  | No                                  | ns              | 0.4073                       |
| mPFC:H <sub>2</sub> O vs. VO-OFC:H <sub>2</sub> O   | -0.02992             | -0.1300 to 0.07012  | No                                  | ns              | 0.9848                       |
| mPFC:H <sub>2</sub> O vs. VO-OFC:EtOH               | -0.02676             | -0.1268 to 0.07328  | No                                  | ns              | 0.9922                       |
| mPFC:EtOH vs. LO-OFC:H <sub>2</sub> O               | -0.06377             | -0.1638 to 0.03627  | No                                  | ns              | 0.5218                       |
| mPFC:EtOH vs. LO-OFC:EtOH                           | -0.04719             | -0.1472 to 0.05284  | No                                  | ns              | 0.8387                       |
| mPFC:EtOH vs. VO-OFC:H <sub>2</sub> O               | -0.007726            | -0.1078 to 0.09231  | No                                  | ns              | >0.9999                      |
| mPFC:EtOH vs. VO-OFC:EtOH                           | -0.004571            | -0.1046 to 0.09547  | No                                  | ns              | >0.9999                      |
| LO-OFC:H <sub>2</sub> O vs. LO-OFC:EtOH             | 0.01657              | -0.08346 to 0.1166  | No                                  | ns              | 0.9996                       |
| LO-OFC:H <sub>2</sub> O vs. VO-OFC:H <sub>2</sub> O | 0.05604              | -0.04400 to 0.1561  | No                                  | ns              | 0.682                        |
| LO-OFC:H <sub>2</sub> O vs. VO-OFC:EtOH             | 0.0592               | -0.04084 to 0.1592  | No                                  | ns              | 0.6175                       |
| LO-OFC:EtOH vs. VO-OFC:H <sub>2</sub> O             | 0.03947              | -0.06057 to 0.1395  | No                                  | ns              | 0.9307                       |
| LO-OFC:EtOH vs. VO-OFC:EtOH                         | 0.04262              | -0.05742 to 0.1427  | No                                  | ns              | 0.8988                       |
| VO-OFC:H <sub>2</sub> O vs. VO-OFC:EtOH             | 0.003155             | -0.09688 to 0.1032  | No                                  | ns              | >0.9999                      |

Figure 4D

| Table Analyzed                    | 26DWO Immature Dendritic Spines |                    |                 |                   |                  |
|-----------------------------------|---------------------------------|--------------------|-----------------|-------------------|------------------|
| Two-way ANOVA                     | Ordinary                        |                    |                 |                   |                  |
| Alpha                             | 0.05                            |                    |                 |                   |                  |
| Source of Variation               | % of total variation            | P value            | P value summary | Significant?      |                  |
| Interaction                       | 3.32                            | 0.3192             | ns              | No                |                  |
| Subregion                         | 3.72                            | 0.2696             | ns              | No                |                  |
| Treatment                         | 3.137                           | 0.0699             | ns              | No                |                  |
| ANOVA table                       | SS (Type III)                   | DF                 | MS              | F (DFn, DFd)      | P value          |
| Interaction                       | 740.4                           | 3                  | 246.8           | F (3, 86) = 1.188 | P=0.3192         |
| Subregion                         | 829.7                           | 3                  | 276.6           | F (3, 86) = 1.331 | P=0.2696         |
| Treatment                         | 699.8                           | 1                  | 699.8           | F (1, 86) = 3.368 | P=0.0699         |
| Residual                          | 17868                           | 86                 | 207.8           |                   |                  |
| Tukey's multiple comparisons test | Predicted (LS) mean diff.       | 95.00% CI of diff. | Below threshold | Summary           | Adjusted P Value |
| ACC:H2O vs. ACC:EtOH              | 6                               | -26.70 to 38.70    | No              | ns                | 0.9991           |
| ACC:H2O vs. mPFC:H2O              | -12.52                          | -34.01 to 8.976    | No              | ns                | 0.6156           |
| ACC:H2O vs. mPFC:EtOH             | 2.857                           | -20.47 to 26.19    | No              | ns                | >0.9999          |
| ACC:H2O vs. LO-OFC:H2O            | 0.625                           | -24.90 to 26.15    | No              | ns                | >0.9999          |
| ACC:H2O vs. LO-OFC:EtOH           | 3.333                           | -23.78 to 30.45    | No              | ns                | >0.9999          |
| ACC:H2O vs. VO-OFC:H2O            | -1.5                            | -25.34 to 22.34    | No              | ns                | >0.9999          |
| ACC:H2O vs. VO-OFC:EtOH           | 2                               | -21.57 to 25.57    | No              | ns                | >0.9999          |
| ACC:EtOH vs. mPFC:H2O             | -18.52                          | -45.52 to 8.490    | No              | ns                | 0.4044           |
| ACC:EtOH vs. mPFC:EtOH            | -3.143                          | -31.63 to 25.35    | No              | ns                | >0.9999          |
| ACC:EtOH vs. LO-OFC:H2O           | -5.375                          | -35.69 to 24.94    | No              | ns                | 0.9993           |
| ACC:EtOH vs. LO-OFC:EtOH          | -2.667                          | -34.33 to 29.00    | No              | ns                | >0.9999          |
| ACC:EtOH vs. VO-OFC:H2O           | -7.5                            | -36.41 to 21.41    | No              | ns                | 0.9924           |
| ACC:EtOH vs. VO-OFC:EtOH          | -4                              | -32.68 to 24.68    | No              | ns                | 0.9999           |
| mPFC:H2O vs. mPFC:EtOH            | 15.37                           | 1.089 to 29.66     | Yes             | *                 | 0.0258           |
| mPFC:H2O vs. LO-OFC:H2O           | 13.14                           | -4.508 to 30.79    | No              | ns                | 0.2986           |
| mPFC:H2O vs. LO-OFC:EtOH          | 15.85                           | -4.027 to 35.72    | No              | ns                | 0.2192           |
| mPFC:H2O vs. VO-OFC:H2O           | 11.02                           | -4.081 to 26.11    | No              | ns                | 0.3238           |
| mPFC:H2O vs. VO-OFC:EtOH          | 14.52                           | -0.1490 to 29.18   | No              | ns                | 0.0544           |
| mPFC:EtOH vs. LO-OFC:H2O          | -2.232                          | -22.08 to 17.62    | No              | ns                | >0.9999          |
| mPFC:EtOH vs. LO-OFC:EtOH         | 0.4762                          | -21.38 to 22.33    | No              | ns                | >0.9999          |
| mPFC:EtOH vs. VO-OFC:H2O          | -4.357                          | -21.97 to 13.26    | No              | ns                | 0.9943           |
| mPFC:EtOH vs. VO-OFC:EtOH         | -0.8571                         | -18.11 to 16.39    | No              | ns                | >0.9999          |
| LO-OFC:H2O vs. LO-OFC:EtOH        | 2.708                           | -21.48 to 26.89    | No              | ns                | >0.9999          |
| LO-OFC:H2O vs. VO-OFC:H2O         | -2.125                          | -22.57 to 18.32    | No              | ns                | >0.9999          |
| LO-OFC:H2O vs. VO-OFC:EtOH        | 1.375                           | -18.75 to 21.50    | No              | ns                | >0.9999          |
| LO-OFC:EtOH vs. VO-OFC:H2O        | -4.833                          | -27.22 to 17.56    | No              | ns                | 0.9976           |
| LO-OFC:EtOH vs. VO-OFC:EtOH       | -1.333                          | -23.44 to 20.77    | No              | ns                | >0.9999          |
| VO-OFC:H2O vs. VO-OFC:EtOH        | 3.5                             | -14.43 to 21.43    | No              | ns                | 0.9987           |



Figure 4E.

|                                          |                                            |                           |                         |                    |                         |
|------------------------------------------|--------------------------------------------|---------------------------|-------------------------|--------------------|-------------------------|
| <b>Table Analyzed</b>                    | <b>26DWO Intermediate Dendritic Spines</b> |                           |                         |                    |                         |
| Two-way ANOVA                            | Ordinary                                   |                           |                         |                    |                         |
| Alpha                                    | 0.05                                       |                           |                         |                    |                         |
| Source of Variation                      | % of total variation                       | P value                   | P value summary         | Significant?       |                         |
| Interaction                              | 5.213                                      | <0.0001                   | ****                    | Yes                |                         |
| Subregion                                | 7.107                                      | <0.0001                   | ****                    | Yes                |                         |
| Treatment                                | 0.7949                                     | 0.045                     | *                       | Yes                |                         |
| ANOVA table                              | SS (Type III)                              | DF                        | MS                      | F (DFn, DFd)       | P value                 |
| Interaction                              | 10387                                      | 3                         | 3462                    | F (3, 440) = 8.833 | P<0.0001                |
| Subregion                                | 14159                                      | 3                         | 4720                    | F (3, 440) = 12.04 | P<0.0001                |
| Treatment                                | 1584                                       | 1                         | 1584                    | F (1, 440) = 4.040 | P=0.0450                |
| Residual                                 | 172475                                     | 440                       | 392                     |                    |                         |
| <b>Tukey's multiple comparisons test</b> | <b>Predicted (LS) mean diff.</b>           | <b>95.00% CI of diff.</b> | <b>Below threshold?</b> | <b>Summary</b>     | <b>Adjusted P Value</b> |
| ACC:H20 vs. ACC:EtOH                     | -7.978                                     | -20.69 to 4.734           | No                      | ns                 | 0.5438                  |
| ACC:H20 vs. mPFC:H20                     | -1.014                                     | -12.06 to 10.04           | No                      | ns                 | >0.9999                 |
| ACC:H20 vs. mPFC:EtOH                    | -7.856                                     | -18.86 to 3.153           | No                      | ns                 | 0.3701                  |
| ACC:H20 vs. LO-OFC:H20                   | -25.53                                     | -38.25 to -12.82          | Yes                     | ****               | <0.0001                 |
| ACC:H20 vs. LO-OFC:EtOH                  | -11.73                                     | -24.45 to 0.9787          | No                      | ns                 | 0.0948                  |
| ACC:H20 vs. VO-OFC:H20                   | -2.511                                     | -15.22 to 10.20           | No                      | ns                 | 0.9989                  |
| ACC:H20 vs. VO-OFC:EtOH                  | -17.2                                      | -29.91 to -4.488          | Yes                     | **                 | 0.0012                  |
| ACC:EtOH vs. mPFC:H20                    | 6.964                                      | -4.087 to 18.01           | No                      | ns                 | 0.5383                  |
| ACC:EtOH vs. mPFC:EtOH                   | 0.1222                                     | -10.89 to 11.13           | No                      | ns                 | >0.9999                 |
| ACC:EtOH vs. LO-OFC:H20                  | -17.56                                     | -30.27 to -4.844          | Yes                     | ***                | 0.0008                  |
| ACC:EtOH vs. LO-OFC:EtOH                 | -3.756                                     | -16.47 to 8.956           | No                      | ns                 | 0.986                   |
| ACC:EtOH vs. VO-OFC:H20                  | 5.467                                      | -7.245 to 18.18           | No                      | ns                 | 0.895                   |
| ACC:EtOH vs. VO-OFC:EtOH                 | -9.222                                     | -21.93 to 3.490           | No                      | ns                 | 0.348                   |
| mPFC:H20 vs. mPFC:EtOH                   | -6.842                                     | -15.88 to 2.198           | No                      | ns                 | 0.2931                  |
| mPFC:H20 vs. LO-OFC:H20                  | -24.52                                     | -35.57 to -13.47          | Yes                     | ****               | <0.0001                 |
| mPFC:H20 vs. LO-OFC:EtOH                 | -10.72                                     | -21.77 to 0.3311          | No                      | ns                 | 0.0647                  |
| mPFC:H20 vs. VO-OFC:H20                  | -1.497                                     | -12.55 to 9.553           | No                      | ns                 | >0.9999                 |
| mPFC:H20 vs. VO-OFC:EtOH                 | -16.19                                     | -27.24 to -5.136          | Yes                     | ***                | 0.0003                  |
| mPFC:EtOH vs. LO-OFC:H20                 | -17.68                                     | -28.69 to -6.669          | Yes                     | ****               | <0.0001                 |
| mPFC:EtOH vs. LO-OFC:EtOH                | -3.878                                     | -14.89 to 7.131           | No                      | ns                 | 0.9621                  |
| mPFC:EtOH vs. VO-OFC:H20                 | 5.344                                      | -5.664 to 16.35           | No                      | ns                 | 0.8187                  |
| mPFC:EtOH vs. VO-OFC:EtOH                | -9.344                                     | -20.35 to 1.664           | No                      | ns                 | 0.1641                  |
| LO-OFC:H20 vs. LO-OFC:EtOH               | 13.8                                       | 1.088 to 26.51            | Yes                     | *                  | 0.0226                  |
| LO-OFC:H20 vs. VO-OFC:H20                | 23.02                                      | 10.31 to 35.73            | Yes                     | ****               | <0.0001                 |
| LO-OFC:H20 vs. VO-OFC:EtOH               | 8.333                                      | -4.379 to 21.05           | No                      | ns                 | 0.4854                  |
| LO-OFC:EtOH vs. VO-OFC:H20               | 9.222                                      | -3.490 to 21.93           | No                      | ns                 | 0.348                   |
| LO-OFC:EtOH vs. VO-OFC:EtOH              | -5.467                                     | -18.18 to 7.245           | No                      | ns                 | 0.895                   |
| VO-OFC:H20 vs. VO-OFC:EtOH               | -14.69                                     | -27.40 to -1.977          | Yes                     | *                  | 0.0112                  |

Figure 4F

| Table Analyzed                    | 26DWO Mature Dendritic Spines |                    |                  |                    |                  |
|-----------------------------------|-------------------------------|--------------------|------------------|--------------------|------------------|
| Two-way ANOVA                     | Ordinary                      |                    |                  |                    |                  |
| Alpha                             | 0.05                          |                    |                  |                    |                  |
| Source of Variation               | % of total variation          | P value            | P value summary  | Significant?       |                  |
| Interaction                       | 5.413                         | <0.0001            | ****             | Yes                |                  |
| Subregion                         | 7.622                         | <0.0001            | ****             | Yes                |                  |
| Treatment                         | 0.3433                        | 0.2168             | ns               | No                 |                  |
| ANOVA table                       | SS (Type III)                 | DF                 | MS               | F (DFn, DFd)       | P value          |
| Interaction                       | 5619                          | 3                  | 1873             | F (3, 390) = 8.043 | P<0.0001         |
| Subregion                         | 7912                          | 3                  | 2637             | F (3, 390) = 11.32 | P<0.0001         |
| Treatment                         | 356.4                         | 1                  | 356.4            | F (1, 390) = 1.530 | P=0.2168         |
| Residual                          | 90826                         | 390                | 232.9            |                    |                  |
| Tukey's multiple comparisons test | Predicted (LS) mean diff.     | 95.00% CI of diff. | Below threshold? | Summary            | Adjusted P Value |
| ACC:H2O vs. ACC:EtOH              | 5.946                         | -4.205 to 16.10    | No               | ns                 | 0.6307           |
| ACC:H2O vs. mPFC:H2O              | 4.595                         | -4.180 to 13.37    | No               | ns                 | 0.7527           |
| ACC:H2O vs. mPFC:EtOH             | 5.798                         | -2.959 to 14.55    | No               | ns                 | 0.4711           |
| ACC:H2O vs. LO-OFC:H2O            | 21.24                         | 10.06 to 32.41     | Yes              | ****               | <0.0001          |
| ACC:H2O vs. LO-OFC:EtOH           | 9.737                         | -0.3525 to 19.83   | No               | ns                 | 0.0674           |
| ACC:H2O vs. VO-OFC:H2O            | 4.785                         | -5.305 to 14.87    | No               | ns                 | 0.8355           |
| ACC:H2O vs. VO-OFC:EtOH           | 17.16                         | 6.803 to 27.51     | Yes              | ****               | <0.0001          |
| ACC:EtOH vs. mPFC:H2O             | -1.351                        | -10.26 to 7.563    | No               | ns                 | 0.9998           |
| ACC:EtOH vs. mPFC:EtOH            | -0.1481                       | -9.044 to 8.747    | No               | ns                 | >0.9999          |
| ACC:EtOH vs. LO-OFC:H2O           | 15.29                         | 4.007 to 26.58     | Yes              | **                 | 0.0011           |
| ACC:EtOH vs. LO-OFC:EtOH          | 3.791                         | -6.419 to 14.00    | No               | ns                 | 0.9496           |
| ACC:EtOH vs. VO-OFC:H2O           | -1.161                        | -11.37 to 9.049    | No               | ns                 | >0.9999          |
| ACC:EtOH vs. VO-OFC:EtOH          | 11.21                         | 0.7396 to 21.68    | Yes              | *                  | 0.0262           |
| mPFC:H2O vs. mPFC:EtOH            | 1.203                         | -6.083 to 8.488    | No               | ns                 | 0.9996           |
| mPFC:H2O vs. LO-OFC:H2O           | 16.64                         | 6.578 to 26.71     | Yes              | ****               | <0.0001          |
| mPFC:H2O vs. LO-OFC:EtOH          | 5.142                         | -3.701 to 13.98    | No               | ns                 | 0.6395           |
| mPFC:H2O vs. VO-OFC:H2O           | 0.1896                        | -8.653 to 9.033    | No               | ns                 | >0.9999          |
| mPFC:H2O vs. VO-OFC:EtOH          | 12.56                         | 3.419 to 21.71     | Yes              | ***                | 0.0009           |
| mPFC:EtOH vs. LO-OFC:H2O          | 15.44                         | 5.391 to 25.49     | Yes              | ***                | 0.0001           |
| mPFC:EtOH vs. LO-OFC:EtOH         | 3.939                         | -4.886 to 12.76    | No               | ns                 | 0.8745           |
| mPFC:EtOH vs. VO-OFC:H2O          | -1.013                        | -9.838 to 7.811    | No               | ns                 | >0.9999          |
| mPFC:EtOH vs. VO-OFC:EtOH         | 11.36                         | 2.234 to 20.49     | Yes              | **                 | 0.0042           |
| LO-OFC:H2O vs. LO-OFC:EtOH        | -11.5                         | -22.73 to -0.2716  | Yes              | *                  | 0.0403           |
| LO-OFC:H2O vs. VO-OFC:H2O         | -16.45                        | -27.68 to -5.224   | Yes              | ***                | 0.0003           |
| LO-OFC:H2O vs. VO-OFC:EtOH        | -4.079                        | -15.55 to 7.388    | No               | ns                 | 0.9599           |
| LO-OFC:EtOH vs. VO-OFC:H2O        | -4.952                        | -15.10 to 5.196    | No               | ns                 | 0.8141           |
| LO-OFC:EtOH vs. VO-OFC:EtOH       | 7.421                         | -2.991 to 17.83    | No               | ns                 | 0.3711           |
| VO-OFC:H2O vs. VO-OFC:EtOH        | 12.37                         | 1.961 to 22.79     | Yes              | **                 | 0.0079           |



Figure 5B

|                                                     |                                  |                           |                         |                    |                         |
|-----------------------------------------------------|----------------------------------|---------------------------|-------------------------|--------------------|-------------------------|
| <b>Table Analyzed</b>                               | <b>26DWO NLG1-NRXN</b>           |                           |                         |                    |                         |
| Two-way ANOVA                                       | Ordinary                         |                           |                         |                    |                         |
| Alpha                                               | 0.05                             |                           |                         |                    |                         |
| Source of Variation                                 | % of total variation             | P value                   | P value summary         | Significant?       |                         |
| Interaction                                         | 4.626                            | 0.0001                    | ***                     | Yes                |                         |
| Subregion                                           | 31.12                            | <0.0001                   | ****                    | Yes                |                         |
| Treatment                                           | 3.041                            | 0.0002                    | ***                     | Yes                |                         |
| ANOVA table                                         | SS (Type III)                    | DF                        | MS                      | F (DFn, DFd)       | P value                 |
| Interaction                                         | 1704                             | 3                         | 568                     | F (3, 286) = 7.137 | P=0.0001                |
| Subregion                                           | 11464                            | 3                         | 3821                    | F (3, 286) = 48.01 | P<0.0001                |
| Treatment                                           | 1120                             | 1                         | 1120                    | F (1, 286) = 14.08 | P=0.0002                |
| Residual                                            | 22762                            | 286                       | 79.59                   |                    |                         |
| <b>Tukey's multiple comparisons test</b>            | <b>Predicted (LS) mean diff.</b> | <b>95.00% CI of diff.</b> | <b>Below threshold?</b> | <b>Summary</b>     | <b>Adjusted P Value</b> |
| ACC:H <sub>2</sub> O vs. ACC:EtOH                   | 10.6                             | 3.566 to 17.63            | Yes                     | ***                | 0.0002                  |
| ACC:H <sub>2</sub> O vs. mPFC:H <sub>2</sub> O      | 15.36                            | 9.213 to 21.50            | Yes                     | ****               | <0.0001                 |
| ACC:H <sub>2</sub> O vs. mPFC:EtOH                  | 16.46                            | 10.32 to 22.61            | Yes                     | ****               | <0.0001                 |
| ACC:H <sub>2</sub> O vs. LO-OFC:H <sub>2</sub> O    | 9.667                            | 2.633 to 16.70            | Yes                     | ***                | 0.0009                  |
| ACC:H <sub>2</sub> O vs. LO-OFC:EtOH                | 6.967                            | -0.06694 to 14.00         | No                      | ns                 | 0.0543                  |
| ACC:H <sub>2</sub> O vs. VO-OFC:H <sub>2</sub> O    | 19.16                            | 12.13 to 26.19            | Yes                     | ****               | <0.0001                 |
| ACC:H <sub>2</sub> O vs. VO-OFC:EtOH                | 26.38                            | 19.35 to 33.42            | Yes                     | ****               | <0.0001                 |
| ACC:EtOH vs. mPFC:H <sub>2</sub> O                  | 4.758                            | -1.387 to 10.90           | No                      | ns                 | 0.2631                  |
| ACC:EtOH vs. mPFC:EtOH                              | 5.863                            | -0.2813 to 12.01          | No                      | ns                 | 0.0736                  |
| ACC:EtOH vs. LO-OFC:H <sub>2</sub> O                | -0.9333                          | -7.967 to 6.100           | No                      | ns                 | >0.9999                 |
| ACC:EtOH vs. LO-OFC:EtOH                            | -3.633                           | -10.67 to 3.400           | No                      | ns                 | 0.7635                  |
| ACC:EtOH vs. VO-OFC:H <sub>2</sub> O                | 8.56                             | 1.526 to 15.59            | Yes                     | **                 | 0.0059                  |
| ACC:EtOH vs. VO-OFC:EtOH                            | 15.78                            | 8.750 to 22.82            | Yes                     | ****               | <0.0001                 |
| mPFC:H <sub>2</sub> O vs. mPFC:EtOH                 | 1.105                            | -3.997 to 6.208           | No                      | ns                 | 0.9979                  |
| mPFC:H <sub>2</sub> O vs. LO-OFC:H <sub>2</sub> O   | -5.691                           | -11.84 to 0.4533          | No                      | ns                 | 0.0921                  |
| mPFC:H <sub>2</sub> O vs. LO-OFC:EtOH               | -8.391                           | -14.54 to -2.247          | Yes                     | **                 | 0.001                   |
| mPFC:H <sub>2</sub> O vs. VO-OFC:H <sub>2</sub> O   | 3.802                            | -2.342 to 9.947           | No                      | ns                 | 0.5593                  |
| mPFC:H <sub>2</sub> O vs. VO-OFC:EtOH               | 11.03                            | 4.881 to 17.17            | Yes                     | ****               | <0.0001                 |
| mPFC:EtOH vs. LO-OFC:H <sub>2</sub> O               | -6.796                           | -12.94 to -0.6520         | Yes                     | *                  | 0.0187                  |
| mPFC:EtOH vs. LO-OFC:EtOH                           | -9.496                           | -15.64 to -3.352          | Yes                     | ****               | <0.0001                 |
| mPFC:EtOH vs. VO-OFC:H <sub>2</sub> O               | 2.697                            | -3.448 to 8.841           | No                      | ns                 | 0.8827                  |
| mPFC:EtOH vs. VO-OFC:EtOH                           | 9.92                             | 3.776 to 16.06            | Yes                     | ****               | <0.0001                 |
| LO-OFC:H <sub>2</sub> O vs. LO-OFC:EtOH             | -2.7                             | -9.734 to 4.334           | No                      | ns                 | 0.9392                  |
| LO-OFC:H <sub>2</sub> O vs. VO-OFC:H <sub>2</sub> O | 9.493                            | 2.460 to 16.53            | Yes                     | **                 | 0.0013                  |
| LO-OFC:H <sub>2</sub> O vs. VO-OFC:EtOH             | 16.72                            | 9.683 to 23.75            | Yes                     | ****               | <0.0001                 |
| LO-OFC:EtOH vs. VO-OFC:H <sub>2</sub> O             | 12.19                            | 5.160 to 19.23            | Yes                     | ****               | <0.0001                 |
| LO-OFC:EtOH vs. VO-OFC:EtOH                         | 19.42                            | 12.38 to 26.45            | Yes                     | ****               | <0.0001                 |
| VO-OFC:H <sub>2</sub> O vs. VO-OFC:EtOH             | 7.223                            | 0.1897 to 14.26           | Yes                     | *                  | 0.0394                  |

|                                                     |                                  |                           |                         |                    |                         |
|-----------------------------------------------------|----------------------------------|---------------------------|-------------------------|--------------------|-------------------------|
| <b>Table Analyzed</b>                               | <b>26DWO NLG3-NRXN</b>           |                           |                         |                    |                         |
| Two-way ANOVA                                       | Ordinary                         |                           |                         |                    |                         |
| Alpha                                               | 0.05                             |                           |                         |                    |                         |
| Source of Variation                                 | % of total variation             | P value                   | P value summary         | Significant?       |                         |
| Interaction                                         | 6.356                            | <0.0001                   | ****                    | Yes                |                         |
| Subregion                                           | 16.12                            | <0.0001                   | ****                    | Yes                |                         |
| Treatment                                           | 1.793                            | 0.0103                    | *                       | Yes                |                         |
| ANOVA table                                         | SS (Type III)                    | DF                        | MS                      | F (DFn, DFd)       | P value                 |
| Interaction                                         | 2510                             | 3                         | 836.6                   | F (3, 286) = 7.874 | P<0.0001                |
| Subregion                                           | 6364                             | 3                         | 2121                    | F (3, 286) = 19.97 | P<0.0001                |
| Treatment                                           | 708                              | 1                         | 708                     | F (1, 286) = 6.664 | P=0.0103                |
| Residual                                            | 30387                            | 286                       | 106.2                   |                    |                         |
| <b>Tukey's multiple comparisons test</b>            | <b>Predicted (LS) mean diff.</b> | <b>95.00% CI of diff.</b> | <b>Below threshold?</b> | <b>Summary</b>     | <b>Adjusted P Value</b> |
| ACC:H <sub>2</sub> O vs. ACC:EtOH                   | 9                                | 0.8732 to 17.13           | Yes                     | *                  | 0.0184                  |
| ACC:H <sub>2</sub> O vs. mPFC:H <sub>2</sub> O      | 11.6                             | 4.562 to 18.64            | Yes                     | ****               | <0.0001                 |
| ACC:H <sub>2</sub> O vs. mPFC:EtOH                  | 7.2                              | 0.1620 to 14.24           | Yes                     | *                  | 0.0408                  |
| ACC:H <sub>2</sub> O vs. LO-OFC:H <sub>2</sub> O    | 5.178                            | -3.172 to 13.53           | No                      | ns                 | 0.5565                  |
| ACC:H <sub>2</sub> O vs. LO-OFC:EtOH                | 5.733                            | -2.616 to 14.08           | No                      | ns                 | 0.4195                  |
| ACC:H <sub>2</sub> O vs. VO-OFC:H <sub>2</sub> O    | 13.7                             | 5.573 to 21.83            | Yes                     | ****               | <0.0001                 |
| ACC:H <sub>2</sub> O vs. VO-OFC:EtOH                | 21.6                             | 13.47 to 29.73            | Yes                     | ****               | <0.0001                 |
| ACC:EtOH vs. mPFC:H <sub>2</sub> O                  | 2.6                              | -4.438 to 9.638           | No                      | ns                 | 0.9502                  |
| ACC:EtOH vs. mPFC:EtOH                              | -1.8                             | -8.838 to 5.238           | No                      | ns                 | 0.994                   |
| ACC:EtOH vs. LO-OFC:H <sub>2</sub> O                | -3.822                           | -12.17 to 4.527           | No                      | ns                 | 0.8578                  |
| ACC:EtOH vs. LO-OFC:EtOH                            | -3.267                           | -11.62 to 5.083           | No                      | ns                 | 0.933                   |
| ACC:EtOH vs. VO-OFC:H <sub>2</sub> O                | 4.7                              | -3.427 to 12.83           | No                      | ns                 | 0.6436                  |
| ACC:EtOH vs. VO-OFC:EtOH                            | 12.6                             | 4.473 to 20.73            | Yes                     | ****               | <0.0001                 |
| mPFC:H <sub>2</sub> O vs. mPFC:EtOH                 | -4.4                             | -10.15 to 1.347           | No                      | ns                 | 0.2768                  |
| mPFC:H <sub>2</sub> O vs. LO-OFC:H <sub>2</sub> O   | -6.422                           | -13.72 to 0.8718          | No                      | ns                 | 0.1303                  |
| mPFC:H <sub>2</sub> O vs. LO-OFC:EtOH               | -5.867                           | -13.16 to 1.427           | No                      | ns                 | 0.219                   |
| mPFC:H <sub>2</sub> O vs. VO-OFC:H <sub>2</sub> O   | 2.1                              | -4.938 to 9.138           | No                      | ns                 | 0.9848                  |
| mPFC:H <sub>2</sub> O vs. VO-OFC:EtOH               | 10                               | 2.962 to 17.04            | Yes                     | ***                | 0.0005                  |
| mPFC:EtOH vs. LO-OFC:H <sub>2</sub> O               | -2.022                           | -9.316 to 5.272           | No                      | ns                 | 0.9902                  |
| mPFC:EtOH vs. LO-OFC:EtOH                           | -1.467                           | -8.761 to 5.827           | No                      | ns                 | 0.9987                  |
| mPFC:EtOH vs. VO-OFC:H <sub>2</sub> O               | 6.5                              | -0.5380 to 13.54          | No                      | ns                 | 0.0941                  |
| mPFC:EtOH vs. VO-OFC:EtOH                           | 14.4                             | 7.362 to 21.44            | Yes                     | ****               | <0.0001                 |
| LO-OFC:H <sub>2</sub> O vs. LO-OFC:EtOH             | 0.5556                           | -8.011 to 9.122           | No                      | ns                 | >0.9999                 |
| LO-OFC:H <sub>2</sub> O vs. VO-OFC:H <sub>2</sub> O | 8.522                            | 0.1727 to 16.87           | Yes                     | *                  | 0.0417                  |
| LO-OFC:H <sub>2</sub> O vs. VO-OFC:EtOH             | 16.42                            | 8.073 to 24.77            | Yes                     | ****               | <0.0001                 |
| LO-OFC:EtOH vs. VO-OFC:H <sub>2</sub> O             | 7.967                            | -0.3828 to 16.32          | No                      | ns                 | 0.0737                  |
| LO-OFC:EtOH vs. VO-OFC:EtOH                         | 15.87                            | 7.517 to 24.22            | Yes                     | ****               | <0.0001                 |
| VO-OFC:H <sub>2</sub> O vs. VO-OFC:EtOH             | 7.9                              | -0.2268 to 16.03          | No                      | ns                 | 0.0635                  |

Figure S1: All Statistical Analyses Conducted for the Study

| PND 46 Astrocyte Volume (Figure 2B)                |           |           |           |           |      |           |           |           |           |
|----------------------------------------------------|-----------|-----------|-----------|-----------|------|-----------|-----------|-----------|-----------|
| H2O                                                |           |           |           |           | EtOH |           |           |           |           |
|                                                    | ACC       | mPFC      | LO-OFC    | VO-OFC    |      | ACC       | mPFC      | LO-OFC    | VO-OFC    |
| Mean                                               | 21241.11  | 25875.93  | 10207.51  | 9444.724  | Mean | 20590.53  | 23943.1   | 8578.654  | 9536.325  |
| SEM                                                | ±1574.199 | ±1320.006 | ±948.9464 | ±760.1075 | SEM  | ±1577.566 | ±1218.267 | ±455.4112 | ±597.1823 |
|                                                    |           |           |           |           |      |           |           |           |           |
| PND 72 Astrocyte Volume (Figure 2D)                |           |           |           |           |      |           |           |           |           |
| H2O                                                |           |           |           |           | EtOH |           |           |           |           |
|                                                    | ACC       | mPFC      | LO-OFC    | VO-OFC    |      | ACC       | mPFC      | LO-OFC    | VO-OFC    |
| Mean                                               | 22583.12  | 26643.34  | 10549.57  | 7171.821  | Mean | 22292.15  | 27359.79  | 9704.246  | 5708.709  |
| SEM                                                | ±1573.77  | ±853.4966 | ±954.58   | ±727.9249 | SEM  | ±1256.7   | ±1023.595 | ±532.8143 | ±262.4512 |
|                                                    |           |           |           |           |      |           |           |           |           |
| PND 46 Astrocyte-Synaptic Interactions (Figure 3B) |           |           |           |           |      |           |           |           |           |
| H2O                                                |           |           |           |           | EtOH |           |           |           |           |
|                                                    | ACC       | mPFC      | LO-OFC    | VO-OFC    |      | ACC       | mPFC      | LO-OFC    | VO-OFC    |
| Mean                                               | 0.051068  | 0.04899   | 0.092826  | 0.132066  | Mean | 0.032985  | 0.040877  | 0.103724  | 0.11808   |
| SEM                                                | ±0.003792 | ±0.003361 | ±0.006336 | ±0.007241 | SEM  | ±0.001791 | ±0.00278  | ±0.004435 | ±0.006173 |
|                                                    |           |           |           |           |      |           |           |           |           |
| PND 72 Astrocyte-Synaptic Interactions (Figure 3D) |           |           |           |           |      |           |           |           |           |
| H2O                                                |           |           |           |           | EtOH |           |           |           |           |
|                                                    | ACC       | mPFC      | LO-OFC    | VO-OFC    |      | ACC       | mPFC      | LO-OFC    | VO-OFC    |
| Mean                                               | 0.057309  | 0.026233  | 0.099465  | 0.149188  | Mean | 0.034475  | 0.031567  | 0.103806  | 0.091557  |
| SEM                                                | ±0.003903 | ±0.001636 | ±0.006104 | ±0.00822  | SEM  | ±0.001832 | ±0.00157  | ±0.005749 | ±0.00506  |
|                                                    |           |           |           |           |      |           |           |           |           |
| PND 72 Immature Spines (Figure 4D)                 |           |           |           |           |      |           |           |           |           |
| H2O                                                |           |           |           |           | EtOH |           |           |           |           |
|                                                    | ACC       | mPFC      | LO-OFC    | VO-OFC    |      | ACC       | mPFC      | LO-OFC    | VO-OFC    |
| Mean                                               | 15        | 27.51515  | 14.375    | 16.5      | Mean | 9         | 12.14286  | 11.66667  | 13        |
| SEM                                                | ±3.271085 | ±3.966985 | ±1.889232 | ±1.671961 | SEM  | ±0.57735  | ±0.64499  | ±2.108185 | ±1.281025 |
|                                                    |           |           |           |           |      |           |           |           |           |
| PND 72 Intermediate Spines (Figure 4D)             |           |           |           |           |      |           |           |           |           |
| H2O                                                |           |           |           |           | EtOH |           |           |           |           |
|                                                    | ACC       | mPFC      | LO-OFC    | VO-OFC    |      | ACC       | mPFC      | LO-OFC    | VO-OFC    |
| Mean                                               | 60.11111  | 61.125    | 85.64444  | 62.62222  | Mean | 68.08889  | 67.96667  | 71.84444  | 77.31111  |
| SEM                                                | ±3.054591 | ±2.653678 | ±1.756993 | ±3.137632 | SEM  | ±2.911805 | ±2.025459 | ±2.385553 | ±2.617506 |
|                                                    |           |           |           |           |      |           |           |           |           |
| PND 72 Mature Spines (Figure 4D)                   |           |           |           |           |      |           |           |           |           |
| H2O                                                |           |           |           |           | EtOH |           |           |           |           |
|                                                    | ACC       | mPFC      | LO-OFC    | VO-OFC    |      | ACC       | mPFC      | LO-OFC    | VO-OFC    |
| Mean                                               | 38.23688  | 33.64198  | 17        | 33.45238  | Mean | 32.2909   | 32.43902  | 28.5      | 21.07895  |

|                                                                  |            |             |               |               |             |            |             |               |               |
|------------------------------------------------------------------|------------|-------------|---------------|---------------|-------------|------------|-------------|---------------|---------------|
| <b>SEM</b>                                                       | ±2.579452  | ±1.954601   | ±1.308366     | ±2.566921     | <b>SEM</b>  | ±2.193903  | ±1.785307   | ±2.217094     | ±1.641557     |
|                                                                  |            |             |               |               |             |            |             |               |               |
| <b>PND 72 Neuroligin 1 – Neurexin Colocalization (Figure 5B)</b> |            |             |               |               |             |            |             |               |               |
| <b>H2O</b>                                                       |            |             |               |               | <b>EtOH</b> |            |             |               |               |
|                                                                  | <b>ACC</b> | <b>mPFC</b> | <b>LO-OFC</b> | <b>VO-OFC</b> |             | <b>ACC</b> | <b>mPFC</b> | <b>LO-OFC</b> | <b>VO-OFC</b> |
| <b>Mean</b>                                                      | 38.2       | 22.84211    | 28.53333      | 19.04         | <b>Mean</b> | 27.6       | 21.73684    | 31.23333      | 11.81667      |
| <b>SEM</b>                                                       | ±1.962522  | ±1.399022   | ±1.38193      | ±1.243554     | <b>SEM</b>  | ±1.38763   | ±1.347402   | ±1.5497       | ±0.828544     |
|                                                                  |            |             |               |               |             |            |             |               |               |
| <b>PND 72 Neuroligin 3 – Neurexin Colocalization (Figure 6B)</b> |            |             |               |               |             |            |             |               |               |
| <b>H2O</b>                                                       |            |             |               |               | <b>EtOH</b> |            |             |               |               |
|                                                                  | <b>ACC</b> | <b>mPFC</b> | <b>LO-OFC</b> | <b>VO-OFC</b> |             | <b>ACC</b> | <b>mPFC</b> | <b>LO-OFC</b> | <b>VO-OFC</b> |
| <b>Mean</b>                                                      | 34.4       | 22.8        | 29.22222      | 20.7          | <b>Mean</b> | 25.4       | 27.2        | 28.66667      | 12.8          |
| <b>SEM</b>                                                       | ±1.701656  | ±1.181735   | ±2.010892     | ±1.194961     | <b>SEM</b>  | ±1.337006  | ±2.001101   | ±1.687055     | ±1.13198      |

Figure S2: Mean ± SEM for all data sets.

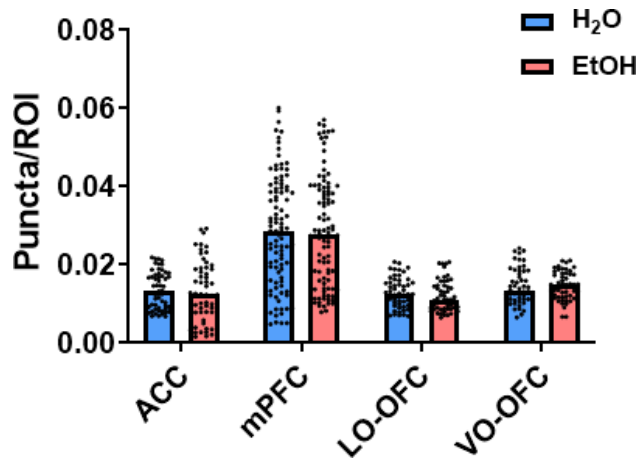

**Figure S3.** Data demonstrating no effect of treatment on PSD-95 expression in any PFC subregions at PND72 ( $F(1, 502) = 0.05115$ ,  $p = 0.8212$ ), when significant AIE-induced loss of PAP-synaptic interactions occur. It should be noted that there is a subregion effect ( $F(3, 502) = 101.9$ ,  $p < 0.0001$ ), *post hoc* analysis reveals that this is due to the presence of significantly more PSD-95 puncta within the mPFC when compared to all other subregions ( $p < 0.0001$ , for all comparisons). Data presented as mean  $\pm$  SEM along with individual data points. Analysis: two-way ANOVA with Tukey's post-hoc comparison,  $n=5$ /treatment group.

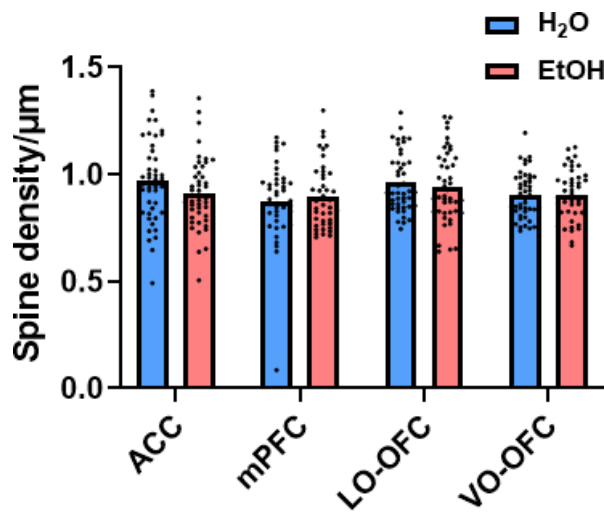

**Figure S4.** Data demonstrating that there was no significant effect of subregion on spine density ( $F(1, 352) = 0.7979$ ,  $p = 0.3723$ ). There are no treatment effects when comparing AIE to control within subregions ( $p > 0.05$ ). Average spine densities were calculated using 2-3 separate dendrites from at least 4-5 separate image stacks per animal for a total of 15 dendritic branches/animal,  $n=3$ /treatment group). Data presented as mean  $\pm$  SEM along with individual data points. Analysis: two-way ANOVA with Tukey's post-hoc comparison.

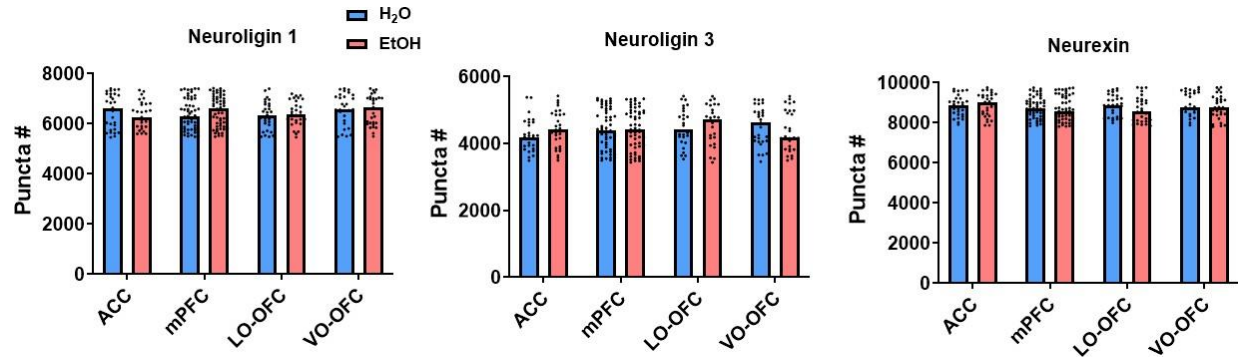

**Figure S5.** Data demonstrating that there is no significant AIE-induced change in the expression of neuroligin 1 ( $F(1, 278) = 0.009163$ ,  $p = 0.9238$ ), neuroligin 3 ( $F(1, 278) = 0.2155$ ,  $p = 0.6429$ ) or their presynaptic partner, neurexin ( $F(1, 272) = 1.710$ ,  $p = 0.1921$ ), indicating that a loss of these proteins is not a driver of AIE-induced loss PAP-synaptic proximity. Data presented as mean  $\pm$  SEM along with individual data points. Three 5  $\mu$ m image stacks from randomly selected hemispheres were captured from 3 separate brain slices per animal ( $n=9-10$  brains/treatment group). Analysis: two-way ANOVA with Tukey's post-hoc comparison.
